**Orally administrated fatty acids enhanced anorectic potential but did not activate  
central fatty acid sensing in Senegalese sole post-larvae**

**Cristina Velasco<sup>1</sup>, Kruno Bonacic<sup>2</sup>, José L. Soengas<sup>1</sup>, and Sofia Morais<sup>2,3</sup>**

<sup>1</sup>Laboratorio de Fisioloxía Animal, Departamento de Bioloxía Funcional e Ciencias da Saúde, Facultade de Bioloxía, Universidade de Vigo, E-36310 Vigo, Spain

<sup>2</sup>IRTA, Ctra. Poble Nou Km 5.5, 43540 Sant Carles de la Ràpita, Spain

<sup>3</sup>Lucta S.A., Innovation Division, UAB Research Park, Eureka building, 08193 Bellaterra, Spain

**Corresponding author:**

Dr. Sofia Morais  
Lucta S.A., Innovation Division  
UAB Research Park, Eureka building  
08193 Bellaterra, Spain  
Tel. +34 - 938 458 888  
Fax +34 - 938 459 812  
E-mail: [sofia.morais@lucta.com](mailto:sofia.morais@lucta.com)

## ABSTRACT

Studies in fish have reported the presence and function of fatty acid (FA)-sensing systems comparable in many aspects to those known in mammals. Such studies were carried out in juvenile and adult fish, but the presence of FA sensing systems and control of food intake has never been evaluated in early stages, despite the importance of establishing when appetite regulation becomes functional in larval fish. In this study we aimed to elucidate the possible effects of different specific FA on neural FA sensing systems and neuropeptides involved in the control of food intake in Senegalese sole post-larvae. To achieve this, we orally administered post-larvae with different solutions containing pure FA - oleate (OA), linoleate (LA),  $\alpha$ -linolenate (ALA) or eicosapentaenoate (EPA) - and evaluated changes in mRNA abundance of neuropeptides involved in the control of food intake and of transcripts related to putative FA-sensing systems, 3 h and 6 h post-administration. Results of neuropeptide gene expression were relatively consistent with the activation of anorectic pathways (enhanced *cart4* and *pomcb*) and decrease in orexigenic factors (*npy*) following intake of FA. Even if there were a few differences depending on the nature of the FA, the observed changes appear to suggest the existence of a putative anorectic response in fish post-larvae to the ingestion of all four tested FA. However, changes in neuropeptides cannot be explained by the integration of metabolic information of FA in circulation through FA sensing mechanisms in the brain. Only the reduction in mRNA levels of *acc* in OA- (6 h), ALA- (3 h) and EPA-treated (3 h and 6 h) post-larvae could be indicative of the presence of a FA sensing system, but most genes were either not significantly regulated (*fat/cd36-lmp2*, *acl*, *kir6.x*, *srebp1c*) or were affected (*fat/cd36-pg4l*, *fas*, *cpt1.1*, *cpt1.2*, *cpt1.3*, *sur*, *ppar $\alpha$*  and *lxr $\alpha$* ) in a way inconsistent with FA sensing mechanisms.

**Key words:** Senegalese sole, larvae, PUFA, fatty acid sensing, food intake, cocaine and amphetamine-related transcript

## INTRODUCTION

In previous studies we characterized the presence and function of fatty acid (FA)-sensing systems in the hypothalamus of the teleost fish rainbow trout (*Oncorhynchus mykiss* Walbaum) (Librán-Pérez et al., 2012; 2013; 2014a,b; 2015) and Senegalese sole (*Solea senegalensis* Kaup) (Conde-Sieira et al., 2015) comparable in many aspects to those known in mammals (Blouet and Schwartz, 2010). These systems respond to increased levels of an unsaturated long-chain FA (LCFA) such as oleate (OA, C18:1 n-9) and correlate with the expression of neuropeptides involved in the control of food intake (Librán-Pérez et al., 2012, 2014a). Fatty acid sensing mechanisms are based on i) FA metabolism via carnitine palmitoyltransferase 1 (CPT-1) inhibition to import FA-CoA for oxidation into the mitochondria; ii) binding to FA translocase (FAT/CD36) and modulation of the transcription factors peroxisome proliferator-activated receptor type  $\alpha$  (PPAR $\alpha$ ) and sterol regulatory element-binding protein type 1c (SREBP1c); and iii) production of reactive oxygen species in the mitochondria, resulting in an inhibition of ATP-dependent inward rectifier potassium channel (K<sub>ATP</sub>) activity (Soengas, 2014). The activation of these systems relates to the inhibition of the orexigenic factors agouti-related protein (AgRP) and neuropeptide Y (NPY), and the enhancement of the anorexigenic factors cocaine and amphetamine-related transcript (CART) and pro-opiomelanocortin (POMC) (Librán-Pérez et al., 2012, 2014a; Conde-Sieira et al., 2015), ultimately leading to decreased food intake.

In contrast to what is known in mammals, we also provided evidence in Senegalese sole juveniles for the activation of FA sensing systems by polyunsaturated FA (PUFA). Furthermore, hypothalamic FA sensing systems in Senegalese sole were activated by  $\alpha$ -linolenate (ALA, C18:3 n-3) but not by eicosapentanoate (EPA, C20:5 n-3) (Conde-Sieira et al., 2015), indicating that the response might be specific to certain PUFA. Therefore, both level of unsaturation and chain length of FA seem to be important factors for the hypothalamic sensing capacity, at least in Senegalese sole juveniles, but are probably not the only factors involved. The finding that FA sensing systems in Senegalese sole respond to changes in PUFA levels may relate to the general importance of PUFA (especially of the n-3, but also of the n-6 series) in marine fish (Tocher, 2003).

Studies in fish regarding FA sensing systems and control of food intake have only been carried out in juveniles and adults so far (Librán-Pérez et al., 2012, 2014;

Conde-Sieira et al., 2015). However, it is of great importance to clearly establish when appetite regulation becomes functional in fish larvae, particularly in species of commercial interest to aquaculture. Very little is known concerning the neural regulation of feeding and appetite during early larval stages, with very few studies describing changes in the expression of brain neuropeptides (Kortner et al., 2011; Gomes et al., 2015). As far as we know, there are no available studies assessing the impact of specific nutrients in the regulation of food intake in fish larvae and post-larvae. In a preliminary study with Senegalese sole (Bonacic et al., 2016) we observed that feeding larvae with *Artemia* enriched with different oils (olive, soybean, linseed and cod liver oil) resulted in differences in food intake, specifically in a higher ingestion of preys enriched with cod liver oil. However, the expression of neuropeptides in whole larvae could not explain such differences, even if these larvae had the most dissimilar gene expression pattern of the four dietary treatments. Similar findings were obtained in the same experiment with post-larvae (although effects in food intake were less clear due to higher variability). At this stage, even if a correlation was still not found to explain differences in diet intake, gene expression in the body and head of post-metamorphic larvae was generally more in accordance with the putative anorexigenic or orexigenic function of the analyzed genes, which could suggest a slightly more developed regulatory system. The used oils were especially rich in specific FA such as OA in the olive oil, linoleate (LA, C18:2 n-6) in soybean oil, ALA in linseed oil, and EPA in cod liver oil. However, other nutrients present in the diet could also have interacted in the effect, so the observed responses could not have been unequivocally attributed to any of these specific FA.

In the current study we aimed to elucidate the possible effects of different specific FA on neural FA sensing systems and neuropeptides involved in the control of food intake in the early stages of fish. To achieve these objectives, we orally administered different solutions containing OA, LA, ALA or EPA to Senegalese sole post-larvae. Due to the small size of the animals, which prevented dissection of specific brain regions, we evaluated changes in mRNA abundance of neuropeptides related to the control of food intake, such as *agrp2*, *npy*, *pomca*, *pomcb*, *cart1a*, *cart1b*, *cart2b* and *cart4* in head sections. Furthermore, we also evaluated changes in mRNA abundance of transcripts related to putative FA-sensing systems based on 1) FA metabolism, such as acetyl-CoA carboxylase (*acc*), ATP-citrate lyase (*acly*), *cpt-1*, and

fatty acid synthase (*fas*); 2) binding to FAT/CD36, such as *fat/cd36*, liver X receptor  $\alpha$  (*lxra*), *ppara*, and *srebp1c*; and, 3) mitochondrial activity, such as inward rectifier K<sup>+</sup> channel pore type 6.x (*kir6.x*) and sulfonyleurea receptor (*sur*).

## MATERIALS AND METHODS

### Fish

Newly hatched Senegalese sole larvae were obtained from Stolt Sea Farm S.A. (Carnota, A Coruña, Spain) and distributed into two 100 L cylindroconical tanks at a density of 50 larvae L<sup>-1</sup>. The tanks were connected to a recirculation system (IRTAMAR®) with 50% daily water renewal and regulated temperature (18-19 °C), salinity (35 ppt) and dissolved oxygen (7.5 mg L<sup>-1</sup>). The photoperiod was 16 h light: 8 h dark, with a light intensity of <500 lux at the water surface. Feeding was performed twice a day (at 09:30 and 17:30). Larvae were fed rotifers enriched with Algamac 3050 flake (Aquafauna Bio-Marine, Inc., Hawthorne CA, USA), according to manufacturer's instructions, at 10 rotifers mL<sup>-1</sup> from 1 to 9 days post-hatching (dph). Algamac-enriched *Artemia* metanauplii were introduced at 7 dph and fed until 12 dph, in quantities gradually increasing from 0.5 to 3 metanauplii mL<sup>-1</sup>. From 13 dph onwards, to avoid influence from high levels of lipids in the enrichment product, larvae were fed only non-enriched *Artemia* metanauplii (kept in clean seawater instead of the enrichment emulsion), at 4 metanauplii mL<sup>-1</sup> during the planktonic stage (until 20 dph). After settling of the majority of the larvae, frozen non-enriched *Artemia* was also added in increasing amounts, at 6-12 metanauplii mL<sup>-1</sup> in total, up to 40 dph. Feeding non-enriched *Artemia* without significantly affecting growth performance is possible in Senegalese sole larvae given the relatively low requirements for lipids and essential fatty acids in this species, compared to other marine species, particularly after settlement (Dâmaso-Rodrigues et al., 2010).

The experiments described here comply with the Guidelines of the European Union Council (2010/63/UE) and the Spanish Government (RD53/2013) for the use of animals in research, with protocols (including tube feeding, described below) approved by the ethics committee of IRTA.

## Experimental design

Post-larvae were tube-fed one of four FA treatments on four consecutive days, from 36 to 39 dph. Test solutions consisted of the following pure free FA: Oleate (OA,  $\geq 99\%$ ), linoleate (LA,  $\geq 99\%$ ),  $\alpha$ -linolenate (ALA  $\geq 99\%$ ) or eicosapentaenoate (EPA,  $\geq 98.5\%$ ), all from Sigma-Aldrich (Madrid, Spain). On each preceding day, a group of post-larvae were taken from the rearing tanks and washed in a submerged 1mm net (to remove any uneaten *Artemia*), transferred into a 4 L tray with clean water from the recirculation system and moved to the experimental room (climatized at 18°C), where they were kept with aeration and fasted for 18 h overnight. Post-larvae were gently anesthetized with 1mL L<sup>-1</sup> of tricaine methanesulfonate (MS-222, at 20 g L<sup>-1</sup>) before being tube fed either a saline (CTR) or test solution. The post-larvae were individually tube fed a FA treatment under a dissecting microscope using a plastic capillary (0.19 mm inner diameter, Sigma-Aldrich) attached to a Nanoliter 2000 injector and micromanipulator (World Precision Instruments, Sarasota, FL, USA), to deposit ~46 nL of the solution in the post-larvae foregut, as described in Rønnestad et al. (2001). Each post-larva was then transferred into an incubation system of plates containing 10 mL wells with clean seawater. Four post-larvae (n=4) were tube-fed per treatment and time point (3 and 6 h incubation, to allow for luminal absorption of FAs; Morais et al. 2005) and other four post-larvae (n=4) were tube fed a saline solution and then immediately sacrificed (CTR, reflecting the basal condition), every 4 consecutive days. The whole process took under 2 min per animal but, in order to avoid interference from the time of tube feeding, each day the order of administering each treatment was changed. Hence, each day a larvae tube-fed a FA treatment in a different order was added to the sample pools, so that every sample (pool of 4 post-larvae) contained animals tube fed at slightly different times, equally for each treatment. Larvae were sacrificed by a lethal dose of MS-222, washed and transferred to an eppendorf containing RNAlater stabilization buffer (Ambion, Life Technologies, Madrid, Spain), kept in agitation at 4 °C for 24 h, and then stored at -80 °C. The post-larvae were later dissected on ice under a dissecting microscope, in order to separate and remove the body from the head section, which was then processed for molecular analysis of selected neuropeptide genes and genes involved in central FA sensing pathways.

## Analysis of relative expression by real-time quantitative RT-PCR

Total RNA was extracted from the head sections by homogenization in TRIzol (Ambion) with 50 mg of 1 mm diameter zirconium glass beads in a Mini-Beadbeater (Biospec Products Inc., U.S.A.). Solvent extraction was performed following manufacturer's instructions and RNA quality and quantity were assessed by gel electrophoresis and spectrophotometry (NanoDrop2000, Thermo Fisher Scientific, Madrid, Spain). Two micrograms of total RNA per sample were reverse transcribed into cDNA using the High-Capacity cDNA RT kit (Applied Biosystems, Life Technologies, U.S.A.), following manufacturer's instructions, but using a mixture of random primers (1.5  $\mu$ l as supplied) and anchored oligo-dT (0.5  $\mu$ l at 400 ng/ $\mu$ l, Eurogentec, Cultek, S.L., Madrid, Spain). Negative controls (containing no enzyme) were performed to check for genomic DNA contamination.

Gene expression levels were determined by real-time quantitative RT-PCR (q-PCR) using the iCycler iQ (BIO-RAD, Hercules, CA, USA). Analyses were performed on 5  $\mu$ l of diluted (1/50) cDNA using the SsoAdvanced™ Universal SYBR® Green Supermix (Bio-Rad), in a total PCR reaction volume of 15  $\mu$ l, containing 120-500 nM of each primer. Sequences of the forward and reverse primers used for each gene expression assay are shown in Table 1. Relative quantification of the target genes was done using elongation factor 1 alpha (*ef1a*) and ubiquitin (*ubq*) as reference genes. Thermal cycling was initiated with incubation at 95°C for 2 min; 35 steps of qPCR were performed, each one consisting of heating at 95°C for 15 s, 30 s at each specific annealing temperature (Table 1) and 30 s at 72°C. Following the final PCR cycle, melting curves were systematically monitored (temperature gradient at 0.5°C/s from 55 to 94°C) to ensure that only one fragment was amplified. Samples without reverse transcriptase and samples without cDNA were run as negative controls, which were indeed negative, and confirmed no amplification of genomic DNA. Relative expression of the target genes was calculated using the delta-delta CT method ( $2^{-\Delta\Delta CT}$ ), following Pffafel (2001).

## Statistics

Comparisons among groups were carried out using the statistical package SigmaStat (Systat Software, Inc) with two-way ANOVA having FA treatment and time as main factors. In cases where a significant effect was noted, post-hoc comparisons

were carried out by a Student-Newman-Keuls test. Differences were considered statistically significant at  $P < 0.05$ .

## RESULTS

The mRNA abundance of neuropeptides is shown in Fig. 1. The levels of *npv* (Fig. 1A) decreased after treatment with LA (6 h), ALA (3 and 6 h), and EPA (6 h) compared to the CTR; the levels in LA-treated fish after 6 h were also significantly reduced compared to the 3 h time point. The expression of *pomcb* (Fig. 1D) increased postprandially with all FA assessed, compared to the CTR, and then decreased in OA-treated fish from 3 h to 6 h post-treatment. The mRNA levels of *cart1b* (Fig. 1F) were reduced in ALA-treated group compared with the remaining groups 6 h after FA administration. The expression of *cart4* (Fig. 1H) increased after treatment with OA (6 h), ALA (6 h), and EPA (3 and 6 h) compared to the CTR, and further increased in OA- and EPA-treated fish from 3 h to 6 h post-treatment. No significant changes were observed for *agrp2* (Fig. 1B), *pomca* (Fig. 1C), *cart1a* (Fig. 1E) and *cart2b* (Fig. 1G) mRNA levels.

The expression of genes related to FA transport and metabolism is shown in Fig. 2. The mRNA levels of *fat/cd36 (pg4l)* (Fig. 2B) increased 6 h after treatment with OA, and this value was also higher than the same treatment at 3 h. The expression of *acc* (Fig. 2C) decreased after treatment with OA (6 h), ALA (3 h) and EPA (3 and 6 h); in OA-treated fish mRNA levels were reduced from 3 h to 6 h. The levels of *fas* (Fig. 2E) increased after treatment with OA (3 and 6 h), LA (3 h), ALA (3 and 6 h) and EPA (3 h), but then decreased from 3 h to 6 h in all treatments. No significant changes were observed for *fat/cd36 (Imp2)* (Fig. 2A) and *acly* (Fig. 2D).

The mRNA level of genes involved in mitochondrial activity and  $K_{ATP}$  channel is shown in Fig. 3. The levels of *cpt1.1* (Fig. 3A) increased 6 h after treatment with OA compared to the CTR, and was also higher than the same treatment at 3 h. The expression of *cpt1.2* (Fig. 3B) increased after treatment with ALA (3 and 6 h) and decreased after treatment with EPA (6 h) compared to the CTR; in OA-treated fish there was an increase from 3 h to 6 h. The mRNA abundance of *cpt1.4* (Fig. 3C) increased in OA- (6 h), LA- (6 h), ALA- (6 h) and EPA-treated (3 and 6 h) fish compared to the CTR, and also in LA-treated fish from 3 h to 6 h post-treatment. The expression of *sur*



(Fig. 3E) increased after treatment with OA (3 h), LA (3 h), ALA (3 and 6 h), and EPA (3 h) compared to the CTR. No significant changes were observed for *kir6.x* (Fig. 3D).

The mRNA abundance of three transcription factors is shown in Fig. 4. The values of *ppara* (Fig. 4A) increased after treatment with OA (3 h) and ALA (6 h) compared to the CTR, while its expression was reduced from 3 h to 6 h in OA- and EPA-treated fish. The expression of *lxra* (Fig. 4C) was not different to the CTR for any of the treatments but was reduced from 3 h to 6 h in fish treated with OA and LA. In the case of *srebp1c* (Fig. 4B), there were no significant differences.

## DISCUSSION

### Orally administrated FA enhanced anorectic potential in Senegalese sole post-larvae

The oral treatment with different FA induced changes in the mRNA abundance of some neuropeptides in sole post-larvae. Despite not all peptides displaying changes in their mRNA abundance, the changes observed generally suggest the existence of an anorectic response in fish post-larvae to the ingestion of different FA. In particular, enhanced expression of anorexigenic neuropeptides (CART and POMC; at least one homologue – *cart4* and *pomcb*) was observed in parallel with decreased transcript levels of the orexigenic *npv* neuropeptide (although no effect was observed in *agrp2*). A similar effect was also suggested in juveniles of the same species after intraperitoneal (i.p.) injection with FA (Conde-Sieira et al., 2015), although there were important differences in the responses of the different neuropeptides and FA assessed. For instance, in the present experiment there was no response of *cart2b* or *agrp2* to any treatment, in contrast to juvenile sole where *cart2b* and *agrp2* were significantly regulated (increased and decreased, respectively) in the hypothalamus following i.p. treatment with OA or ALA (Conde-Sieira et al., 2015). Interestingly, *cart2b* was also significantly increased by the EPA treatment, similarly to the *cart4* homologue in the present study. Dissimilarities in the results could potentially be due to differences in the maturity of the fish or in the methodology employed, i.e. oral versus i.p. administration of free FA. In the present study, the orally administrated FA will have been absorbed through the intestinal mucosa, where they can be at least partly metabolised, or reacylated into neutral or polar lipids and incorporated into chylomicrons for transport,

reflecting the normal pathways in a fish feeding on a complete diet (only skipping the digestion step).

On the other hand, an increased anorectic potential was also observed in the hypothalamus of rainbow trout fed a lipid-enriched diet (Librán-Pérez et al., 2015), which could suggest a conserved mechanism in teleosts in response to the ingestion of FA.

### **All four assessed FA appear to have potential to enhance the anorectic response**

In spite of a few differences, the present results do not seem to indicate major discrepancies between the different FA tested with respect to their potential to affect the anorectic response of Senegalese sole post-larvae. The treatment with OA induced an increased anorectic potential based on the increased expression of the anorectic peptides *pomcb* and *cart4* postprandially. This increased anorectic potential after OA treatment is similar to that already observed in juvenile fish of the same species (Conde-Sieira et al., 2015), as well as in rainbow trout (Librán-Pérez et al. 2012, 2014a). Treatment with LA also stimulated the anorectic potential based on the increased mRNA abundance of *pomcb* and the decreased expression of the orexigenic neuropeptide *npv*. As far as we are aware, this is the first time that the effects of this FA have been assessed in any species. ALA intake similarly induced clear responses in the mRNA abundance of neuropeptides including increased expression of *pomcb* and *cart4* and decreased expression of *npv*. The resulting anorectic potential is comparable to that observed in the hypothalamus of juvenile fish of the same species when fish were i.p. treated with the same FA (Conde-Sieira et al., 2015). The EPA treatment induced basically the same response as ALA, which is very interesting since in juvenile sole the i.p. treatment with EPA did not result in relevant changes in the expression of these peptides (only of *cart2b*; Conde-Sieira et al., 2015).

In a previous experiment we analysed changes in gene expression of peripheral peptides and neuropeptides in Senegalese sole larvae and post-larvae after feeding *Artemia* enriched with different oils especially rich in the same FA that were administered in the present study (Bonacic et al., 2016). However, it is difficult to correlate the results of the two experiments given that we previously evaluated more complex (complete) diets, likely with lower total amounts of the tested FA, and fed during the whole larval and post larval stage, rather than a single meal as in the present study. The previous experiment showed that larvae and post-larvae fed a diet containing

higher EPA levels (enriched with cod liver oil) tended to have a higher food intake than the remaining treatments, and hence we expected to see differences in neuropeptide expression between treatments. Nevertheless, this did not correlate with a higher orexigenic and/or lower anorexigenic potential in any of the two experiments. In fact, EPA-treated fish showed higher levels of the putatively anorexigenic *cart4* than the remaining treatments in the present experiment. However, different classes of FA can have diverse effects in metabolism and energy homeostasis, and on the release of peripheral appetite-regulating peptides, which can potentially affect food intake through different routes (French et al., 2000; Lawton et al., 2000; Wang et al., 2002; Tocher, 2003; Relling and Reynolds, 2007; Parra et al., 2008; Soengas, 2014). Furthermore, a peptide such as CART, for instance, is known to have multiple physiological functions besides the regulation of feeding (e.g., regulation of energy metabolism, among others) in mammals (Lau and Herzog, 2014). In teleosts, its roles have not been well documented but the retention of several duplicated genes (in sole up to 7 homologues have been reported) suggests the conservation of multiple functions, or even the development of new ones (Bonacic et al., 2015). In this respect, Bonacic et al. (2016) reported the transcriptional regulation of *cart1b*, which did not show a response to the ingestion of food in the brain of sole juveniles (Bonacic et al., 2015), but was affected by the FA composition of the diet in a manner consistent with an anorexigenic role (expression reduced in larvae fed the cod liver oil, EPA-rich, diet). Similarly, *cart1a* and *cart1b* seemed to respond to the FA composition (lipid source) of the diet, correlating with feed intake in juvenile sole (Bonacic et al., unpublished results). In the present study, the transcription of *cart1a* was not significantly regulated postprandially or by the FA treatment, which suggests that dietary effects may be exerted in these genes via long term changes in metabolism and energy homeostatic status rather than FA sensing following a meal. In fact, FA sensing systems did not appear to be activated in the present study (see below), supporting this hypothesis. In the case of *cart1b*, its expression was not affected 3 h after feeding any FA treatment but was significantly reduced 6 h after administration of ALA, but not in any of the remaining treatments, including EPA (as might have been expected from Bonacic et al., 2016). The reasons explaining this response are elusive at the moment, but do not seem to be related to FA sensing. Therefore, although preliminary and still speculative, data is starting to emerge in fish suggesting different roles of CART homologues in modulating the feeding

response to not only dietary lipid levels but also FA composition, and this should be further evaluated in future studies.

### **Post-larval FA sensing systems are not activated by oral treatment with FA**

The presence of several mechanisms involved in FA sensing in mammalian brain was investigated in Senegalese sole in response to the orally administered FA treatments, for the first time in a teleost at such an early stage of development. Highly variable responses were observed in this study, which might suggest that FA sensing systems are not active in the post-larval stage, contrary to what was reported previously after i.p. administration of FA in juveniles of sole (Conde-Sieira et al., 2015), as well as in rainbow trout (Librán-Pérez et al., 2012, 2013, 2014a). In the hypothalamus of juvenile sole, several FA systems were activated by OA and ALA treatment: 1) those based on FA metabolism (decrease in mRNA levels of *acl*, *acc* and *fas*); 2) mechanisms based on binding of FA to FAT/CD36 and subsequent modulation of transcription factors (no effect on *fat/cd36* but reduction of *ppar $\alpha$* , *srebp1c* and *lxr $\alpha$*  expression, although only in OA-treated fish in the latter case); and 3) based on mitochondrial activity (decreased expression of *kir6.x* and *sur*). Furthermore, a differential effect of FA depending on chain length and degree of saturation was described, with a saturated FA such as stearate lacking a response and EPA inducing only a few changes in the transcription of these genes, probably unrelated to a role in FA sensing (Conde-Sieira et al., 2015). In the present study, the only result which is in line with previous observations was the reduction in mRNA levels of *acc* in OA- (only at 6 h) ALA- (3 h) and EPA-treated (3 h and 6 h) post-larvae, while the remaining genes were either not significantly regulated (*fat/cd36-lmp2*, *acl*, *kir6.x*, *srebp1c*) or affected in a way inconsistent with FA sensing mechanisms (*fat/cd36-pg4l*, *fas*, *cpt1.1*, *cpt1.2*, *cpt1.3*, *sur*, *ppar $\alpha$*  and *lxr $\alpha$* ) (Soengas, 2014). However, we cannot disregard the fact that previous results demonstrating the presence of FA sensing systems in sole juveniles were obtained after i.p. injection of free FA, obviating the steps of intestinal absorption, which likely result in different timings and bioavailabilities of circulating FA.

Interestingly, important changes were measured in the postprandial expression of *cpt1* genes after treatment with different FA but, just as observed in juvenile sole, the response was quite variable depending on the isoform that was measured. However, we would need more information, particularly on the functional characterization of these genes, in order to be able to interpret these results.

Therefore, it appears that oral administration of FA to sole post-larvae in this study did not activate central FA sensing systems, even when fish were administered with OA and ALA, which were previously demonstrated to induce the activation of these systems in juvenile sole (Conde-Sieira et al., 2015). The lack of response to any of the tested FA in Senegalese sole post-larvae could suggest that the metabolic control of food intake involving FA sensing is not yet functional at this early stage of development. The finding that the anorectic potential was enhanced irrespective of the FA treatment also supports this possibility. A gradual development of FA sensing capacities is likely since the operability of other mechanisms involved in the control of food intake, such as gastrointestinal remodelling, is also dependent on developmental stage (Kortner et al., 2011; Gomes et al., 2015). However, these results raise an interesting question: if FA sensing systems are not responding to intake of FA, how do neuropeptides respond to FA administration? This differential behaviour may rely on the fact that neurons expressing neuropeptides not only integrate metabolic information on specific nutrients in circulation but additionally integrate information from other sources, including nervous inputs from the gastrointestinal tract and/or levels of peripheral hormones (leptin, insulin, ghrelin, among others) (Wang et al., 2002; Blouet and Schwartz, 2010). Hence, we might speculate that the capacity to integrate this kind of information in brain centres involved in metabolic regulation of food intake might develop earlier than that of FA sensing mechanisms.

In summary, we described for the first time in fish post-larvae the effect of feeding long-chain FA of different nature (including PUFA), such as OA, LA, ALA and EPA on the metabolic regulation of food intake in Senegalese sole. All FA induced changes in the expression of neuropeptides involved in the control of food intake. Although not all the assessed neuropeptides changed their mRNA abundance, changes observed generally suggest an enhanced anorectic potential irrespective of the FA administered. However, none of the treatments activated central FA sensing systems. These results are different from those observed in the hypothalamus of juveniles of the same species where anorectic responses, in parallel with activation of FA sensing systems, were observed in response to specific FA injected i.p. (Conde-Sieira et al., 2015). This different behaviour between post-larvae and juveniles allows us to suggest that the metabolic control of food intake involving the function of FA sensing systems

and integration of this metabolic information through changes in neuropeptide expression might not be functional at this early stage of development.

### **Competing interest**

No competing interest declared by authors

### **Author contributions**

S.M. and J.L.S. conceived and designed the study; K.B. and S.M. performed the experiments; C.V. and K.B. performed the molecular analysis; all authors interpreted the results of the experiments; C.V. and J.L.S. prepared figures; S.M. and J.L.S. had the main responsibility in drafting the manuscript and all authors edited and revised the manuscript.

### **Funding**

This study was supported by research grants from Ministerio de Economía y Competitividad (MINECO) and European Fund for Regional Development (FEDER) to JLS (AGL2013-46448-C3-1-R and AGL2016-74857-C3-1-R), and from MINECO (AGL2011-23502) and the European Commission Marie Curie Actions (FP7-PEOPLE-2010-RG, Project No. 274184) to SM. CV was recipient of a predoctoral fellowship from Universidade de Vigo, and KB of a PhD grant awarded by the Agència de Gestió d'Ajuts Universitaris i de Recerca (AGAUR), Generalitat de Catalunya, Spain.

### **Acknowledgements**

The authors are grateful to Águeda J. Martín-Robles and José A. Muñoz-Cueto (Department of Biology, Faculty of Marine and Environmental Sciences, University of Cádiz, Spain) for supplying us with the qPCR primers for *agrp2* and *npy* and to Almudena Martínez (IRTA) for assistance in fish dissection and RNA extraction.

## References

- Blouet, C. and Schwartz, G.J.** (2010). Hypothalamic nutrient sensing in the control of energy homeostasis. *Behav. Brain Res.* **209**, 1-12.
- Bonacic, K., Martínez, A., Martín-Robles, A.J., Muñoz-Cueto, J.A., and Morais, S.** (2015) Characterization of seven cocaine- and amphetamine-regulated transcripts (CART) differentially expressed in the brain and peripheral tissues of *Solea senegalensis* (Kaup). *Gen. Comp. Endocrinol.* **224**, 260-272.
- Bonacic, K., Campoverde, C., Gómez-Arbones, J., Gisbert, E., Estevez, A., and Morais, S.** (2016). Dietary fatty acid composition affects food intake and gut-brain satiety signaling in Senegalese sole (*Solea senegalensis*, Kaup 1858) larvae and post-larvae. *Gen. Comp. Endocrinol.* **228**, 79-94.
- Conde-Sieira, M., Bonacic, K., Velasco, C., Valente, L.M.P., Morais, S., and Soengas, J.L.** (2015). Hypothalamic fatty acid sensing in Senegalese sole (*Solea senegalensis*): response to long-chain saturated, monounsaturated, and polyunsaturated (n-3) fatty acids. *Am. J. Physiol. Regul. Integr. Comp. Physiol.* **309**, R1521-R1531.
- Dâmaso-Rodrigues, M.L., Pousão-Ferreira, P., Ribeiro, L., Coutinho, J., Bandarra, N.M., Gavaia, P.J., Narciso, L., and Morais, S.** (2010). Lack of essential fatty acids in live feed during larval and post-larval rearing: effect on the performance of juvenile *Solea senegalensis*. *Aquacult. Int.* **18**, 741-757.
- French, S.J., Conlon, C.A., Mutuma, S.T., Arnold, M., Read, N.W., Meijer, G. and Francis, J.** (2000). The effects of intestinal infusion of long-chain fatty acids on food intake in humans. *Gastroenterology* **119**, 943-948.
- Gomes, A.S., Olderbakk Jordal, A.-E., Olsen, K., Harboe, T., Power, D.M., and Ronnestad, I.** (2015). Neuroendocrine control of appetite in Atlantic halibut (*Hippoglossus hippoglossus*): changes during metamorphosis and effects of feeding. *Comp. Biochem. Physiol. A.* **183**, 116-125.
- Kortner, T.M., Overrein, I., Oie, G., Kjorsvik, E., and Arukwe, A.** (2011). The influence of dietary constituents on the molecular ontogeny of digestive capability and effects on growth and appetite in Atlantic cod larvae (*Gadus morhua*). *Aquaculture* **315**, 114-120.
- Lau, J. and Herzog, H.** (2014). CART in the regulation of appetite and energy homeostasis. *Front. Neurosci.* **8**, 313.
- Lawton, C.L., Delargy, H.J., Brockman, J., Smith, F.C. and Blundell, J.E.** (2000). The degree of saturation of fatty acids influences post-ingestive satiety. *Br. J. Nutr.* **83**, 473-482.
- Librán-Pérez, M., Polakof, S., López-Patiño, M.A., Míguez, J.M., and Soengas, J.L.** (2012). Evidence of a metabolic fatty-acid sensing system in the hypothalamus and Brockmann bodies of rainbow trout: implications in food intake regulation. *Am. J. Physiol. Regul. Integr. Comp. Physiol.* **302**, R1340-R1350.
- Librán-Pérez, M., López-Patiño, M.A., Míguez, J.M., and Soengas, J.L.** (2013). Oleic acid and octanoic acid sensing capacity in rainbow trout *Oncorhynchus mykiss* is direct in hypothalamus and Brockmann bodies. *PLoS ONE* **8**, e59507.
- Librán-Pérez, M., Otero-Rodiño, C., López-Patiño, M.A., Míguez, J.M., and Soengas, J.L.** (2014a). Central administration of oleate or octanoate activates hypothalamic fatty acid sensing and inhibits food intake in rainbow trout. *Physiol. Behav.* **129**, 272-279.
- Librán-Pérez, M., Velasco, C., López-Patiño, M.A., Míguez, J.M., and Soengas, J.L.** (2014b). Counter-regulatory response to a fall in circulating fatty acid levels in

rainbow trout. Possible involvement of the hypothalamus-pituitary-interrenal axis. *PLoS ONE* **9**, e113291.

**Librán-Pérez, M., Geurden, I., Dias, K., Corraze, G., Panserat, S., and Soengas, J.L.** (2015). Feeding rainbow trout with a lipid-enriched diet: effects on fatty acid sensing, regulation of food intake and cellular signaling pathways. *J. Exp. Biol.* **218**, 2610-2619.

**Morais, S., Rojas-Garcia, C.R., Conceição, L.E.C. and Rønnestad, I.** (2005). Digestion and absorption of a pure triacylglycerol and a free fatty acid by *Clupea harengus* L. larvae. *J. Fish. Biol.* **67**, 223-238.

**Parra, D., Ramel, A., Bandarra, N., Kiely, M., Martínez, J.A. and Thorsdottir, I.** (2008). A diet rich in long chain omega-3 fatty acids modulates satiety in overweight and obese volunteers during weight loss. *Appetite* **51**, 676-680.

**Pfaffl, M.W.** (2001). A new mathematical model for relative quantification in real-time RT-PCR. *Nucleic Acids Res.* **29**, e45.

**Relling, A.E. and Reynolds, C.K.** (2007). Feeding rumen-inert fats differing in their degree of saturation decreases intake and increases plasma concentrations of gut peptides in lactating dairy cows. *J. Dairy. Sci.* **90**, 1506-1515.

**Rønnestad, I., Rojas-García, C.R., Tonheim, S.K. and Conceição, L.E.C.** (2001). *In vivo* studies of digestion and nutrient assimilation in marine fish larvae. *Aquaculture* **201**, 161–175.

**Soengas, J.L.** (2014). Contribution of glucose- and fatty acid sensing systems to the regulation of food intake in fish. A review. *Gen. Comp. Endocrinol.* **205**, 36-48.

**Tocher, D.R.** (2003). Metabolism and functions of lipids and fatty acids in teleost fish. *Rev. Fish. Sci.* **11**, 107-184.

**Wang, H., Storlien, L.H. and Huang X.F.** (2002). Effects of dietary fat types on body fatness, leptin, and ARC leptin receptor, NPY, and AgRP mRNA expression. *Am. J. Physiol. Endocrinol. Metab.* **282**, E1352-E1359.



**Table 1. Nucleotide sequences of the probes used to evaluate mRNA abundance by RT-PCR (qPCR).**

| Gene                   | Forward primer              | Reverse primer              | Annealing Temperature (°C) | Data Base            | Reference                |
|------------------------|-----------------------------|-----------------------------|----------------------------|----------------------|--------------------------|
| <i>acc</i>             | CAGCTGGGTGGAATTCAGAT        | ATGGGATCTTTGGCACTGAG        | 60                         | SoleaDB <sup>1</sup> | solea_v4.1_unigene15555  |
| <i>acly</i>            | CCACAGATTCACACCATTGC        | GCCAGGATGTTATCCAGCAT        | 60                         | SoleaDB <sup>1</sup> | solea_v4.1_unigene11536  |
| <i>agrp2</i>           | CAGGTCAGACTCCGTGAGCCC       | GTCGACACCGACAGGAGGCAC       | 64                         | SoleaDB <sup>1</sup> | solea_v4.1_unigene32957  |
| <i>cart1a</i>          | CGTCCACCACTGTCATTCTG        | CTTTCTCCTCCTGCGTCTTG        | 60                         | GenBank              | KT189188                 |
| <i>cart1b</i>          | TCGCTGAAAAGTCAACAAGAAA      | GCCAAGCTTTTTCTCCAGTG        | 60                         | GenBank              | KT189189                 |
| <i>cart2b</i>          | AGGACCATGCAGAGTTCCAG        | GGACTCGGTGTCCATCACTT        | 60                         | GenBank              | KT189191                 |
| <i>cart4</i>           | GTGAGCGAGAGCAGGAAACT        | TCGTGGTCAAATAAGGCAAA        | 60                         | GenBank              | KT189194                 |
| <i>cpt1.1</i>          | TAACAGCCACCGTCGACATA        | AGCGATTCCCTTGTGTCACT        | 63                         | GenBank              | KR872890                 |
| <i>cpt1.2</i>          | TCGCCAAGAATAACCGAAC         | AGACCTGGCGTAGAGCTTCA        | 64                         | GenBank              | KR872891                 |
| <i>cpt1.3</i>          | CCTGACTGTTGACCCCAAGT        | TCACTCACAGTTACAGGCA         | 60                         | GenBank              | KR872892                 |
| <i>ef1a</i>            | GATTGACCGTCGTTCTGGCAAGAAGC  | GGCAAAGCGACCAAGGGGAGCAT     | 70                         | GenBank              | CAB326302                |
| <i>fas</i>             | CACAAGAACATCAGCCGAGA        | GAAACATTGCCGTACACAC         | 60                         | GenBank              | KP842777                 |
| <i>fat/cd36 (lmp2)</i> | TATGTGGCGGTAATGGATCA        | GCCGGTGTGGAATACAAACT        | 60                         | GenBank              | KR872888                 |
| <i>fat/cd36 (pg4l)</i> | TGAATGAGACGGCTGAGTTG        | TGTTGTTTCTGCTCCTCACG        | 64                         | GenBank              | KR872889                 |
| <i>kir6.x</i>          | AGATGTTGGCGAGAAAGAGC        | GCTCGGGATGTTCTTGT           | 60                         | SoleaDB <sup>1</sup> | solea_v4.1_unigene120423 |
| <i>lxra</i>            | AAAGCAGGGCTTCAGTTTGA        | CAGCCTCTCCACCAGATCAT        | 60                         | SoleaDB <sup>1</sup> | solea_v4.1_unigene47872  |
| <i>npy</i>             | GAGGGATACCCGATGAAACC        | GCTGGACCTCTTCCCATAACC       | 60                         | SoleaDB <sup>1</sup> | solea_v4.1_unigene466117 |
| <i>pomca</i>           | AAGGCAAAGAGGCGTTGTAT        | TTCTTGAACAGCGTGAGCAG        | 60                         | GenBank              | FR851915                 |
| <i>pomcb</i>           | GTCGAGCAACACAAGTTCCA        | GTCAGCTCGTCGTAGCGTTT        | 60                         | GenBank              | FR851916                 |
| <i>ppara</i>           | AAACCGCCTCTCATCATCC         | CACACCTGGAAACACATCTCC       | 60                         | GenBank              | JX4240810                |
| <i>srebp1c</i>         | TCCAAGGCTTTTCAGCAAGAT       | CTCCTCTGTCTTGGCTCCAG        | 60                         | SoleaDB <sup>1</sup> | solea_v4.1_unigene4060   |
| <i>sur</i>             | GCAGCACCTTCCGTTACCTA        | GCAGCAGCTTAGAGGACGAC        | 60                         | SoleaDB <sup>1</sup> | solea_v4.1_unigene446925 |
| <i>ubq</i>             | AGCTGGCCCAGAAATATAACTGCGACA | ACTTCTTCTTGCGGCAGTTGACAGCAC | 70                         | GenBank              | CAB291588                |

<sup>1</sup>SoleaDB: [http://www.juntadeandalucia.es/agriculturaypesca/ifapa/soleadb\\_ifapa/](http://www.juntadeandalucia.es/agriculturaypesca/ifapa/soleadb_ifapa/)

*acc*, Acetyl-CoA carboxylase; *acly*, ATP-citrate lyase; *agrp*, Agouti related peptide 2; *cart*, cocaine- and amphetamine-related transcript; *cpt1.1*, carnitine palmitoyl transferase type 1, isoform 1; *cpt1.2*, carnitine palmitoyl transferase type 1, isoform 2; *cpt1.3*, carnitine palmitoyl transferase type 1, isoform 3; *ef1a*, elongation factor 1 $\alpha$ ; *fas*, fatty acid synthetase; *fat/cd36 (lmp2)*, fatty acid translocase lysosome membrane protein 2-like; *fat/cd36 (pg4l)*, fatty acid translocase platelet glycoprotein 4-like; *kir6.x*, inward rectifier K<sup>+</sup> channel pore type 6.x; *lxra*, liver X receptor  $\alpha$ ; *npy*, neuropeptide Y; *pomc*, pro-opio melanocortin A1; *ppara*, peroxisome proliferator-activated receptor type  $\alpha$ ; *srebp1c*, sterol regulatory element-binding protein type 1c; *sur*, sulfonylurea receptor; *ubq*, ubiquitin.

## Figures

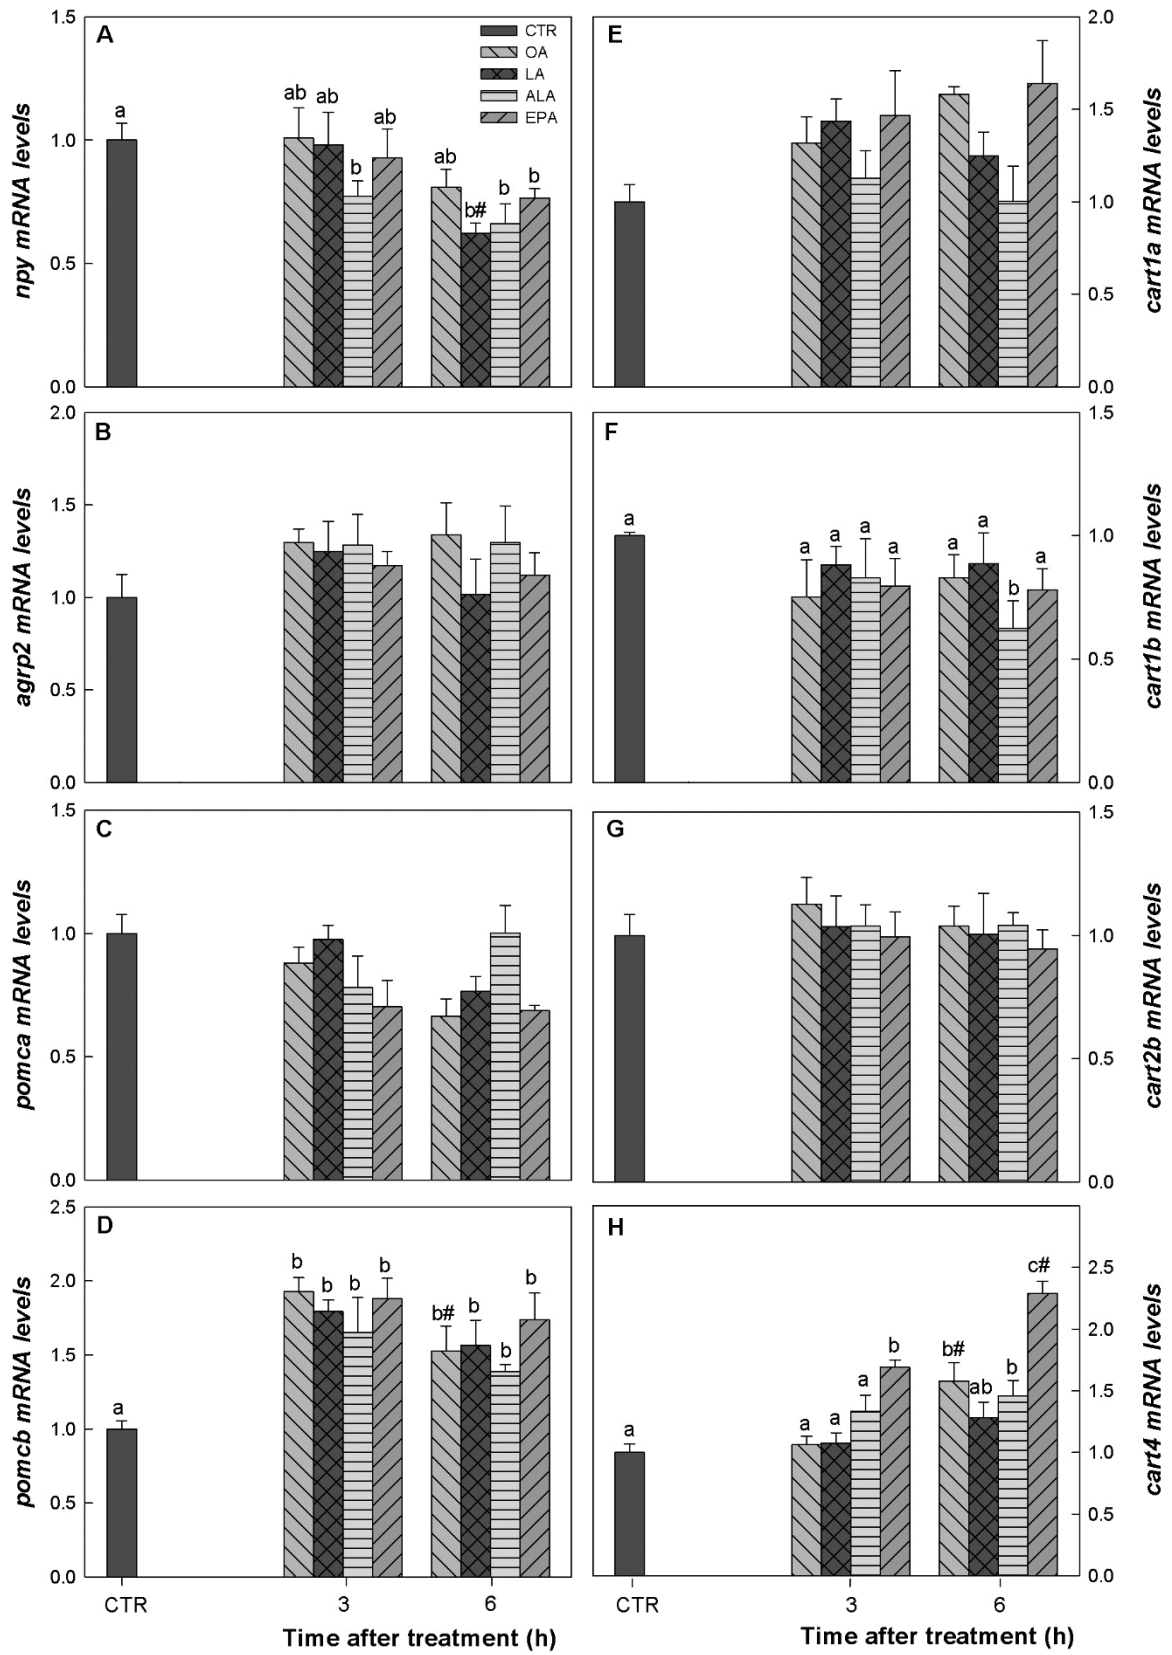

**FIGURE 1. Neuropeptide mRNA abundance in Senegalese sole head.** mRNA abundance of *npv* (A), *grp2* (B), *pmca* (C), *pmcb* (D), *cart1a* (E), *cart1b* (F), *cart2b* (G) and *cart4* (H) in head of Senegalese sole post-larvae after oral administration of saline (control, CTR), or 3 h and 6 h after administration of oleate (OA), linoleate (LA),  $\alpha$ -linolenate (ALA) or eicosapentanoate (EPA). Gene expression results are expressed relative to the control group and are normalized by *ef1a* and *ubq* expression. Each value is the mean  $\pm$  SEM of n=4 pools of 4 fish each per treatment. Differences were assessed by two-way ANOVA, having FA treatment and time as main factors. Different letters indicate significant differences (P<0.05) between treatment groups; # represents significantly different (P<0.05) than the same treatment after 3h.

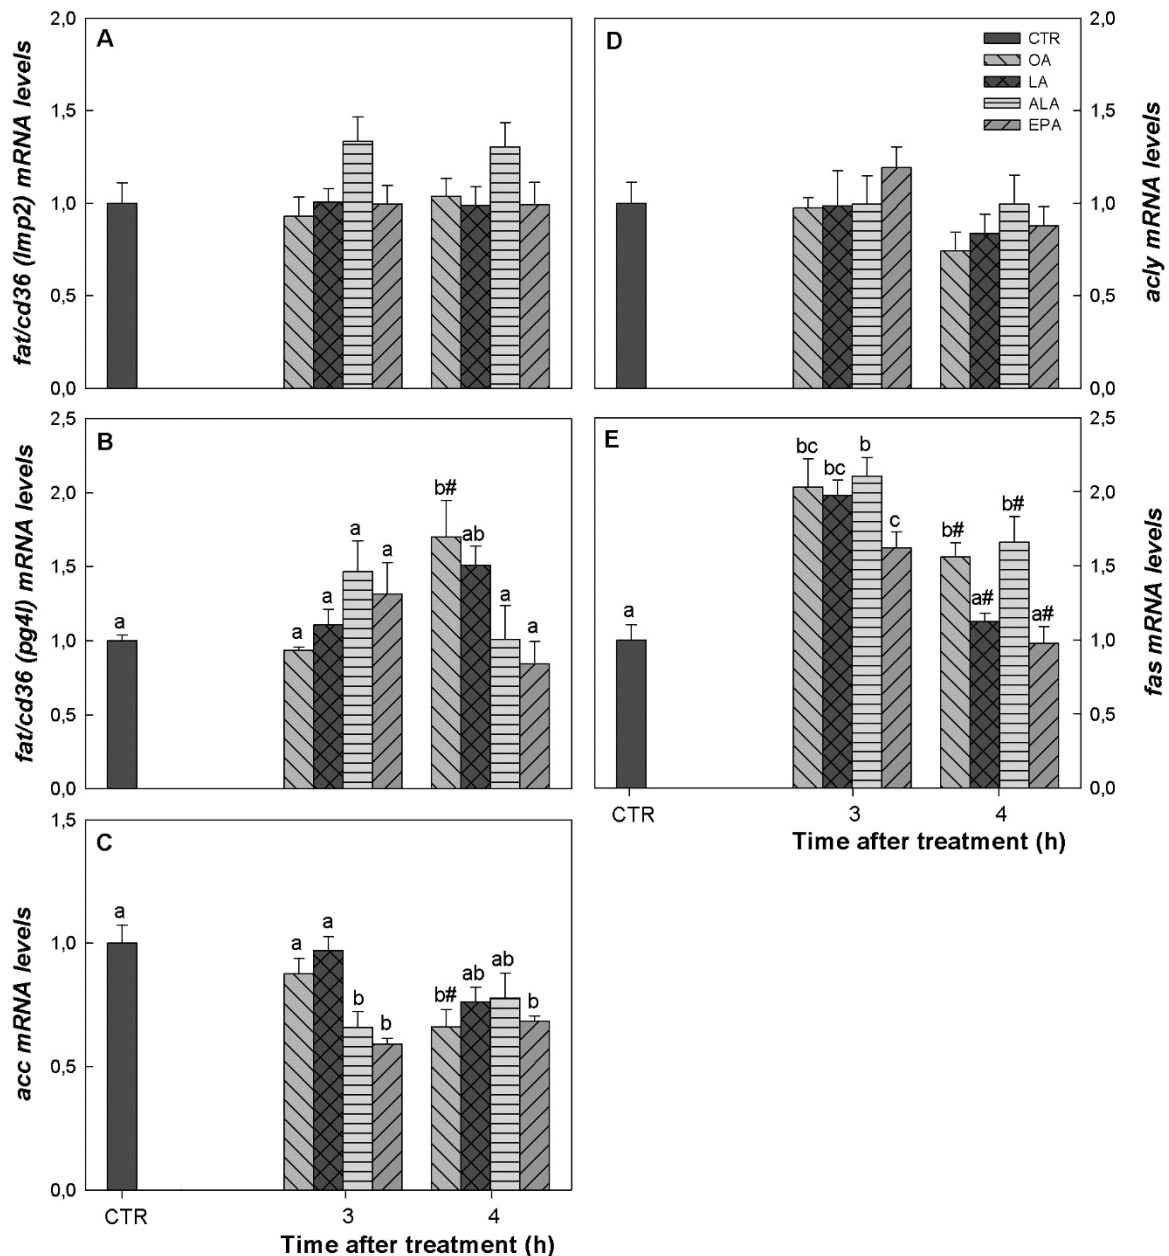

**FIGURE 2. Parameters related to fatty acid transport and metabolism in Senegalese sole head.** mRNA abundance of *fat/cd36 (lmp2)* (A), *fat/cd36 (pg4l)* (B), *acc* (C), *acly* (D) and *fas* (E) in head of Senegalese sole post-larvae after oral administration of saline (control, CTR), or 3 h and 6 h after administration of oleate (OA), linolenate (LA),  $\alpha$ -linoleate (ALA) or eicosapentanoate (EPA). Gene expression results are expressed relative to the control group and are normalized by *efl $\alpha$*  and *ubq* expression. Each value is the mean  $\pm$  SEM of n=4 pools of 4 fish each per treatment. Differences were assessed by two-way ANOVA, having FA treatment and time as main factors. Different letters indicate significant differences ( $P < 0.05$ ) between treatment groups; # represents significantly different ( $P < 0.05$ ) than the same treatment after 3h.

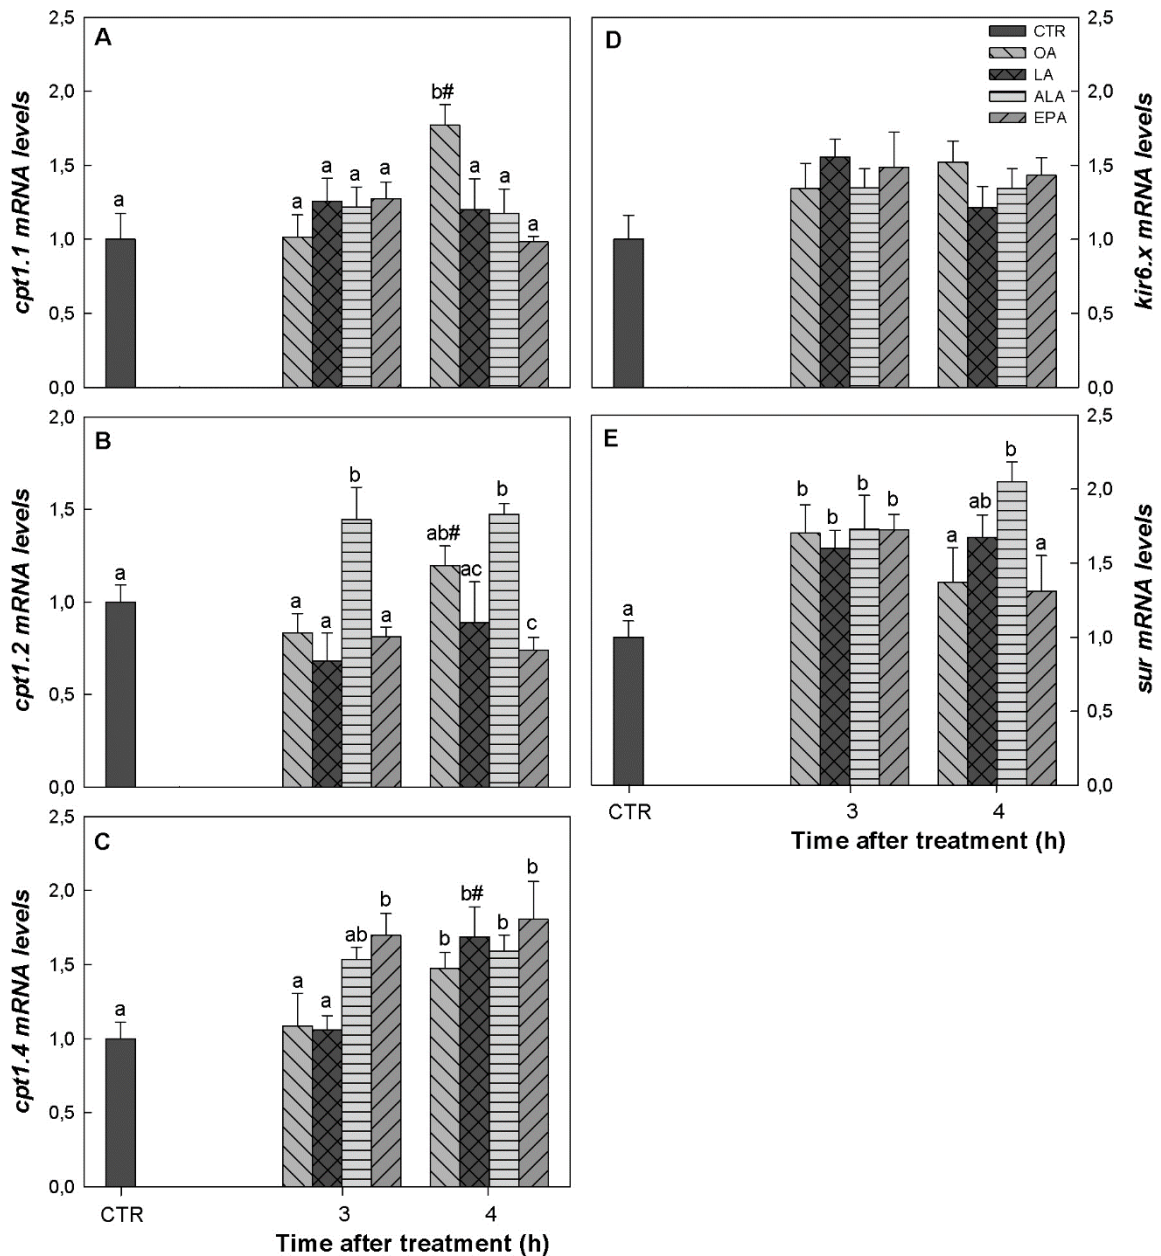

**FIGURE 3. Parameters related to mitochondrial activity in Senegalese sole head.**

mRNA abundance of *cpt1.1* (A), *cpt1.2* (B), *cpt1.4* (C), *kir6.x* (D) and *sur* (E) in head of Senegalese sole post-larvae after oral administration of saline (control, CTR), or 3 h and 6 h after administration of oleate (OA), linoleate (LA),  $\alpha$ -linolenate (ALA) or eicosapentanoate (EPA). Gene expression results are expressed relative to the control group and are normalized by *efl $\alpha$*  and *ubq* expression. Each value is the mean  $\pm$  SEM of  $n=4$  pools of 4 fish each per treatment. Differences were assessed by two-way ANOVA, having FA treatment and time as main factors. Different letters indicate significant differences ( $P<0.05$ ) between treatment groups; # represents significantly different ( $P<0.05$ ) than the same treatment after 3h.

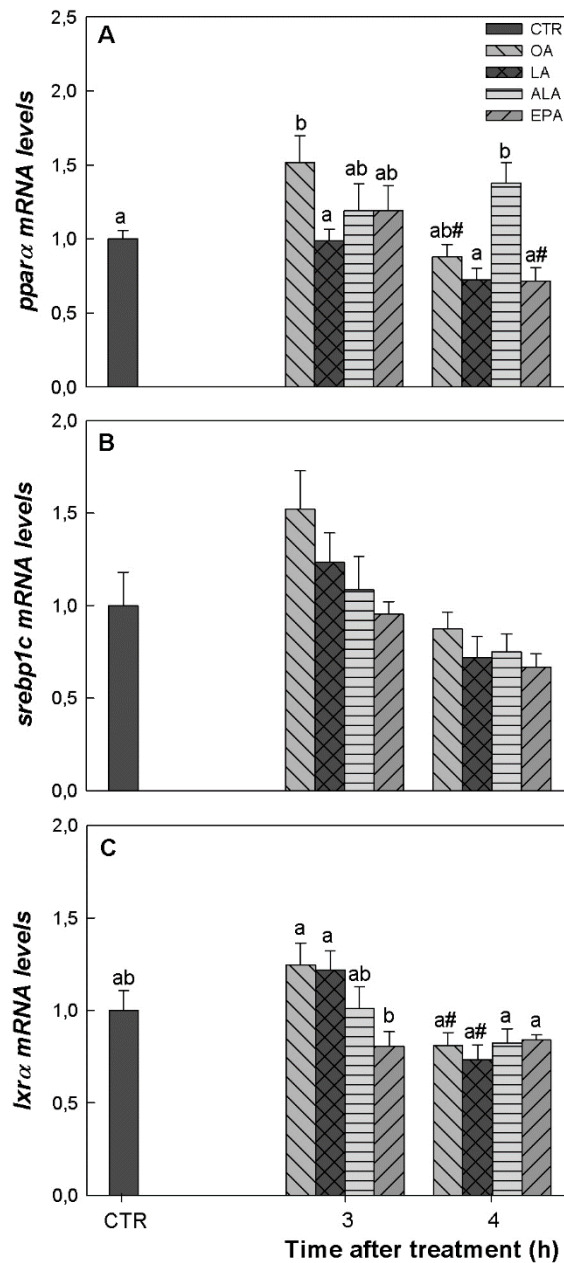

**FIGURE 4. Transcription factors in Senegalese sole head.** mRNA abundance of *pparα* (A), *srebp1c* (B) and *lxrα* (C) in head of Senegalese sole post-larvae after oral administration of saline (control, CTR), or 3 h and 6 h after administration of oleate (OA), linoleate (LA),  $\alpha$ -linolenate (ALA) or eicosapentanoate (EPA). Gene expression results are expressed relative to the control group and are normalized by *eflα* and *ubq* expression. Each value is the mean  $\pm$  SEM of n=4 pools of 4 fish each per treatment. Differences were assessed by two-way ANOVA, having FA treatment and time as main factors. Different letters indicate significant differences ( $P < 0.05$ ) between treatment groups; # represents significantly different ( $P < 0.05$ ) than the same treatment after 3h.
